# Supplementary material for: Acetate-induced controlled-synthesis of hematite polyhedra enclosed by high-activity facets for enhanced photocatalytic performance
Source: Royal Society of Chemistry journal article supplement (doi:10.1039/c6ra07809e), 2016-01-01
Supplement: c6ra07809e1.pdf [file c6ra07809e1.pdf]

## Supporting Information

*for*

### **Acetates-induced controllable synthesis of hematite polyhedra enclosed by high-activity facets for enhanced photocatalytic performance**

Hao Wan,<sup>abc</sup> Tao Liu,<sup>ab</sup> Xiaohe Liu,<sup>ab\*</sup> Jiangling Pan,<sup>b</sup> Ning Zhang,<sup>b</sup> Renzhi Ma,<sup>bc\*</sup> Shuquan Liang,<sup>b</sup> Haidong Wang,<sup>a\*</sup> Guanzhou Qiu<sup>a</sup>

<sup>a</sup> School of Minerals Processing and Bioengineering, Central South University, Changsha, Hunan 410083 (China).

<sup>b</sup> School of Materials Science and Engineering, Central South University, Changsha, Hunan 410083 (China).

<sup>c</sup> International Center for Materials Nanoarchitectonics, National Institute for Materials Science, 1-1 Namiki, Tsukuba, Ibaraki 305-0044 (Japan).

#### **Experimental Details**

**1. Materials.** All of the chemical reagents, such as  $\text{FeCl}_3 \cdot 6\text{H}_2\text{O}$ ,  $\text{NH}_4\text{Ac}$ ,  $\text{KAc}$ ,  $\text{NaAc}$  and absolute  $\text{EtOH}$  were of analytic grade from Sinopharm Chemical Reagent Co.,Ltd and used without further purification.

**2. Synthesis of  $\alpha\text{-Fe}_2\text{O}_3$  truncated bipyramids, nanopseudocubes and hexagonal nanoplates.** All of these three kinds of hematite polyhedra were synthesized *via* a facile hydrothermal method. In a typical route for  $\alpha\text{-Fe}_2\text{O}_3$  truncated bipyramids,  $\text{FeCl}_3 \cdot 6\text{H}_2\text{O}$  (0.54g) and  $\text{KAc}$  (1.91g) were dissolved in the system of  $\text{EtOH-H}_2\text{O}$  (20:1, v/v) mixed solvent under continuous stirring to form orange solution. Then the

mixture was transferred to a 40ml Teflon-lined stainless steel autoclave and kept at 180°C for 24h. After cooled to room temperature, the product was collected by high-speed centrifugation, washed with water and EtOH for several times and dried at 60°C for 4h. The morphology evolution of  $\alpha$ -Fe<sub>2</sub>O<sub>3</sub> polyhedra was readily tailored by tuning the species of acetates. For preparing  $\alpha$ -Fe<sub>2</sub>O<sub>3</sub> nanopseudocubes, KAc source was substituted by equivalent stoichiometric NH<sub>4</sub>Ac while keeping other synthetic parameters unchanged. And for  $\alpha$ -Fe<sub>2</sub>O<sub>3</sub> nanoplates, a similar method reported previously,<sup>1</sup> using NaAc as acetate source, was adopted.

**3. Characterization.** The phase composition information of the as-prepared products was determined by X-ray diffraction (XRD) analysis on a D/max2550 VB+ diffractometer with CuK $\alpha$  radiation ( $\lambda=0.15405$  nm). The morphology of the products was evaluated by using FEI Helios Nanolab 600i scanning electron microscopy (SEM). Transmission electron microscopy (TEM) image, high-resolution TEM (HRTEM) and the selected area electron diffraction (SAED) patterns were recorded on a Tecnai G2 F20 transmission electron microscope.

**4. Photodegradation of RhB.** The photocatalytic performance of all the products with different facets exposed were characterized toward photodegradation of RhB under Xe light irradiation. The absorbance of aqueous RhB was collected with a UV-vis spectroradiometer (Shimadzu UV-2600). Typically, the products (30mg) were dispersed in 150ml RhB solution with 0.7ml H<sub>2</sub>O<sub>2</sub> ( $\geq 28$ wt%). The adsorption-desorption equilibrium of RhB on the surface of the photocatalysts was facilitated under magnetic stirring in the dark for 40min. Then a Xe light (250W) was 15 cm above the liquid level and used to irradiate the mixture cooled by circulating water cooling system ( $6\pm 0.1$ °C). After specific intervals, the dispersion was centrifuged and the upper was measured of the absorbance at 550nm.

## References

1 L.Q. Chen, X.F. Yang, J. Chen, J. Liu, H. Wu, H.Q. Zhan, C.L. Liang, M.M. Wu, *Inorg. Chem.* 2010, 49, 8411.

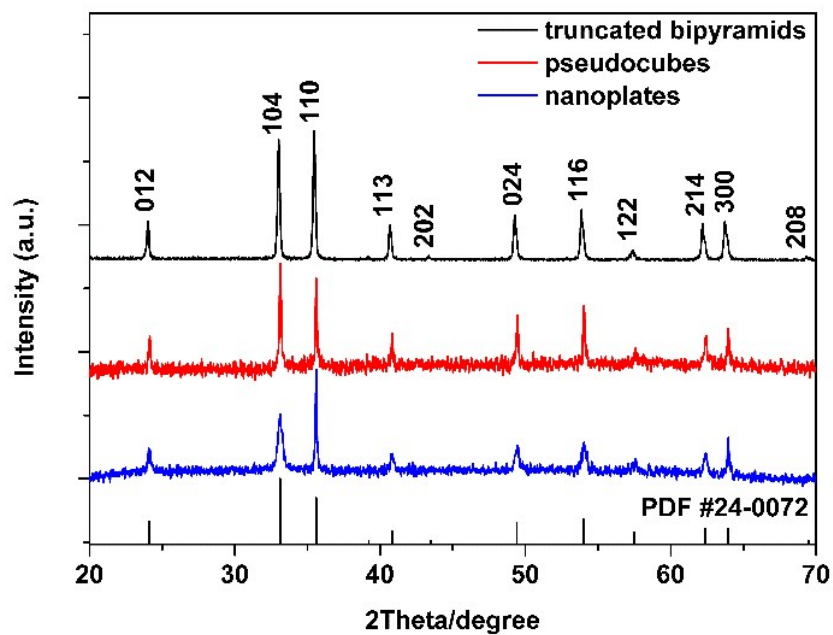

**Figure S1.** XRD patterns of  $\alpha$ -Fe<sub>2</sub>O<sub>3</sub> truncated bipyramids (black line), pseudocubes (red line) and nanoplates (blue line).

**Table S1** Photocatalytic properties of  $\alpha$ -Fe<sub>2</sub>O<sub>3</sub> truncated bipyramids, pseudocubes and nanoplates.

| Morphology           | Dominant facets | Bandgap (eV) | Rate constants k [ $\times 10^{-2} \text{ min}^{-1}$ ] |
|----------------------|-----------------|--------------|--------------------------------------------------------|
| truncated bipyramids | {101}/{001}     | 2.10         | 10.51                                                  |
| pseudocubes          | {012}           | 2.16         | 4.84                                                   |
| nanoplates           | {001}           | 2.17         | 3.42                                                   |

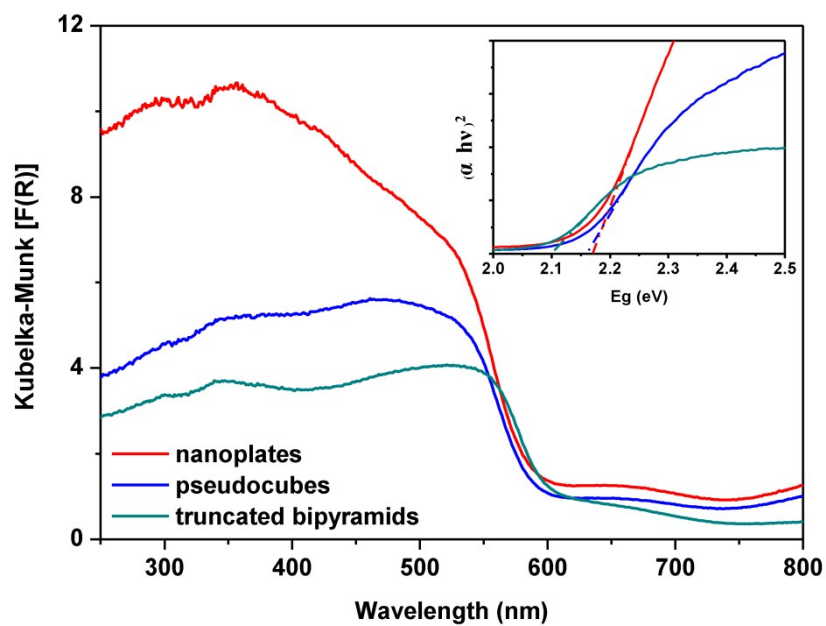

**Figure S2.** UV-vis diffuse reflectance spectra of the as-prepared  $\alpha$ - $\text{Fe}_2\text{O}_3$  polyhedra with enclosed by specific facets. The inset is the calculation diagram of the bandgaps, which is determined to be 2.10, 2.16 and 2.17 eV for  $\alpha$ - $\text{Fe}_2\text{O}_3$  truncated bipyramids, pseudocubes and nanoplates, respectively.
